# Supplementary material for: A de novo variant in PAK2 detected in an individual with Knobloch type 2 syndrome
Source: PubMed Central journal article supplement — bioRxiv. 2024 Apr 22:2024.04.18.590108. Preprint. [Version 1] doi: 10.1101/2024.04.18.590108 (PMC11071314; doi:10.1101/2024.04.18.590108), 2024-04-22
Supplement: media-1.pdf [file media-1.pdf]

```
{
  "id": "affected_individual_",
  "subject": {
    "id": "affected individual ",
    "timeAtLastEncounter": {
      "age": {
        "iso8601duration": "P1Y3M"
      }
    },
    "sex": "MALE"
  },
  "phenotypicFeatures": [
    {
      "type": {
        "id": "HP:0000541",
        "label": "Retinal detachment"
      },
      "onset": {
        "age": {
          "iso8601duration": "P1D"
        }
      }
    },
    {
      "type": {
        "id": "HP:0001643",
        "label": "Patent ductus arteriosus"
      },
      "onset": {
        "age": {
          "iso8601duration": "P1D"
        }
      }
    },
    {
      "type": {
        "id": "HP:0001508",
        "label": "Failure to thrive"
      },
      "onset": {
        "age": {
          "iso8601duration": "P3M"
        }
      }
    },
    {
      "type": {
        "id": "HP:0001643",
        "label": "Tube feeding"
      },
      "onset": {
        "age": {
          "iso8601duration": "P3M"
        }
      }
    }
  ],
}
```

```
{
  "type": {
    "id": "HP:0002021",
    "label": "Pyloric stenosis"
  },
  "onset": {
    "age": {
      "iso8601duration": "P3M"
    }
  }
},
{
  "type": {
    "id": "HP:0002013",
    "label": "Vomiting"
  },
  "onset": {
    "age": {
      "iso8601duration": "P3M"
    }
  }
},
{
  "type": {
    "id": "HP:0005484",
    "label": "Secondary microcephaly"
  },
  "onset": {
    "age": {
      "iso8601duration": "P1Y3M"
    }
  }
},
{
  "type": {
    "id": "HP:0025405",
    "label": "Visual fixation instability"
  },
  "onset": {
    "age": {
      "iso8601duration": "P4M"
    }
  }
},
{
  "type": {
    "id": "HP:0000541",
    "label": "Retinal detachment"
  },
  "onset": {
    "age": {
      "iso8601duration": "P4M"
    }
  }
},
}
```

```
"type": {
  "id": "HP:0002021",
  "label": "Ventriculomegaly"
},
"onset": {
  "age": {
    "iso8601duration": "P4M"
  }
}
},
{
  "type": {
    "id": "HP:0000527",
    "label": "Long eyelashes"
  },
  "onset": {
    "age": {
      "iso8601duration": "P7M"
    }
  }
},
{
  "type": {
    "id": "HP:0000218",
    "label": "High palate"
  },
  "onset": {
    "age": {
      "iso8601duration": "P7M"
    }
  }
},
{
  "type": {
    "id": "HP:0010511",
    "label": "Long toe"
  },
  "onset": {
    "age": {
      "iso8601duration": "P7M"
    }
  }
},
{
  "type": {
    "id": "HP:0002119",
    "label": "Axial hypotonia"
  },
  "onset": {
    "age": {
      "iso8601duration": "P7M"
    }
  }
},
{
  "type": {
```

```
    "id": "HP:0100023",
    "label": "Recurrent hand flapping"
  },
  "onset": {
    "age": {
      "iso8601duration": "P7M"
    }
  }
},
{
  "type": {
    "id": "HP:0025336",
    "label": "Delayed ability to sit"
  },
  "onset": {
    "age": {
      "iso8601duration": "P7M"
    }
  }
},
{
  "type": {
    "id": "HP:0032989",
    "label": "Delayed ability to roll over"
  },
  "onset": {
    "age": {
      "iso8601duration": "P7M"
    }
  }
},
{
  "type": {
    "id": "HP:0000505",
    "label": "Visual impairment"
  },
  "onset": {
    "age": {
      "iso8601duration": "P7M"
    }
  }
},
{
  "type": {
    "id": "HP:0001263",
    "label": "Global developmental delay"
  },
  "onset": {
    "age": {
      "iso8601duration": "P1Y3M"
    }
  }
}
],
"interpretations": [
  {
```

```

"id": "affected individual ",
"progressStatus": "SOLVED",
"diagnosis": {
  "disease": {
    "id": "OMIM:618458",
    "label": "Knobloch syndrome 2"
  },
  "genomicInterpretations": [
    {
      "subjectOrBiosampleId": "affected individual ",
      "interpretationStatus": "CAUSATIVE",
      "variantInterpretation": {
        "variationDescriptor": {
          "id": "var_hWhSlQleEoWlPsljPhhwcAkmR",
          "geneContext": {
            "valueId": "HGNC:8591",
            "symbol": "PAK2"
          },
          "expressions": [
            {
              "syntax": "hgvs.c",
              "value": "NM_002577.4:c.1273G>A"
            },
            {
              "syntax": "hgvs.g",
              "value": "NC_000003.12:g.196820490G>A"
            }
          ],
          "vcfRecord": {
            "genomeAssembly": "hg38",
            "chrom": "chr3",
            "pos": "196820490",
            "ref": "G",
            "alt": "A"
          },
          "moleculeContext": "genomic",
          "allelicState": {
            "id": "GENO:0000135",
            "label": "heterozygous"
          }
        }
      }
    }
  ],
  "metaData": {
    "created": "2024-01-20T15:02:29.990556955Z",
    "createdBy": "ORCID:0000-0002-0736-9199",
    "resources": [
      {
        "id": "geno",
        "name": "Genotype Ontology",
        "url": "http://purl.obolibrary.org/obo/geno.owl",
        "version": "2022-03-05",

```

```

    "namespacePrefix": "GENO",
    "iriPrefix": "http://purl.obolibrary.org/obo/GENO_"
  },
  {
    "id": "hgnc",
    "name": "HUGO Gene Nomenclature Committee",
    "url": "https://www.genenames.org",
    "version": "06/01/23",
    "namespacePrefix": "HGNC",
    "iriPrefix": "https://www.genenames.org/data/gene-symbol-report/#!/hgnc_id/"
  },
  {
    "id": "omim",
    "name": "An Online Catalog of Human Genes and Genetic Disorders",
    "url": "https://www.omim.org",
    "version": "January 4, 2023",
    "namespacePrefix": "OMIM",
    "iriPrefix": "https://www.omim.org/entry/"
  },
  {
    "id": "so",
    "name": "Sequence types and features ontology",
    "url": "http://purl.obolibrary.org/obo/so.obo",
    "version": "2021-11-22",
    "namespacePrefix": "SO",
    "iriPrefix": "http://purl.obolibrary.org/obo/SO_"
  },
  {
    "id": "hp",
    "name": "human phenotype ontology",
    "url": "http://purl.obolibrary.org/obo/hp.owl",
    "version": "2024-01-16",
    "namespacePrefix": "HP",
    "iriPrefix": "http://purl.obolibrary.org/obo/HP_"
  }
],
"phenopacketSchemaVersion": "2.0"
}
}

```
